# Supplementary material for: Exploring Burstein–Moss type effects in nickel doped hematite dendrite nanostructures for enhanced photo-electrochemical water splitting
Source: Royal Society of Chemistry journal article supplement (doi:10.1039/c9cp04132j), 2019-01-01
Supplement: c9cp04132j1.pdf [file c9cp04132j1.pdf]

**Exploring Burstein-Moss Type Effect in Nickel Doped Hematite Dendrite Nanostructure  
for Enhanced Photo-electrochemical Water Splitting**

**Soniya Gahlawat, Jaspreet Singh, Ashok Kumar Yadav Pravin P. Ingole\***

<sup>1</sup>Department of Chemistry, Indian Institute of Technology Delhi, New Delhi, India 110016.

<sup>2</sup>Technical Physics Division, Raja Ramanna Centre for Advanced Technology (RRCAT),  
Indore, India.

<sup>3</sup>Atomic & Molecular Physics Division, Raja Ramanna Centre for Advanced Technology  
(RRCAT), Indore, India.

**Supporting Information**

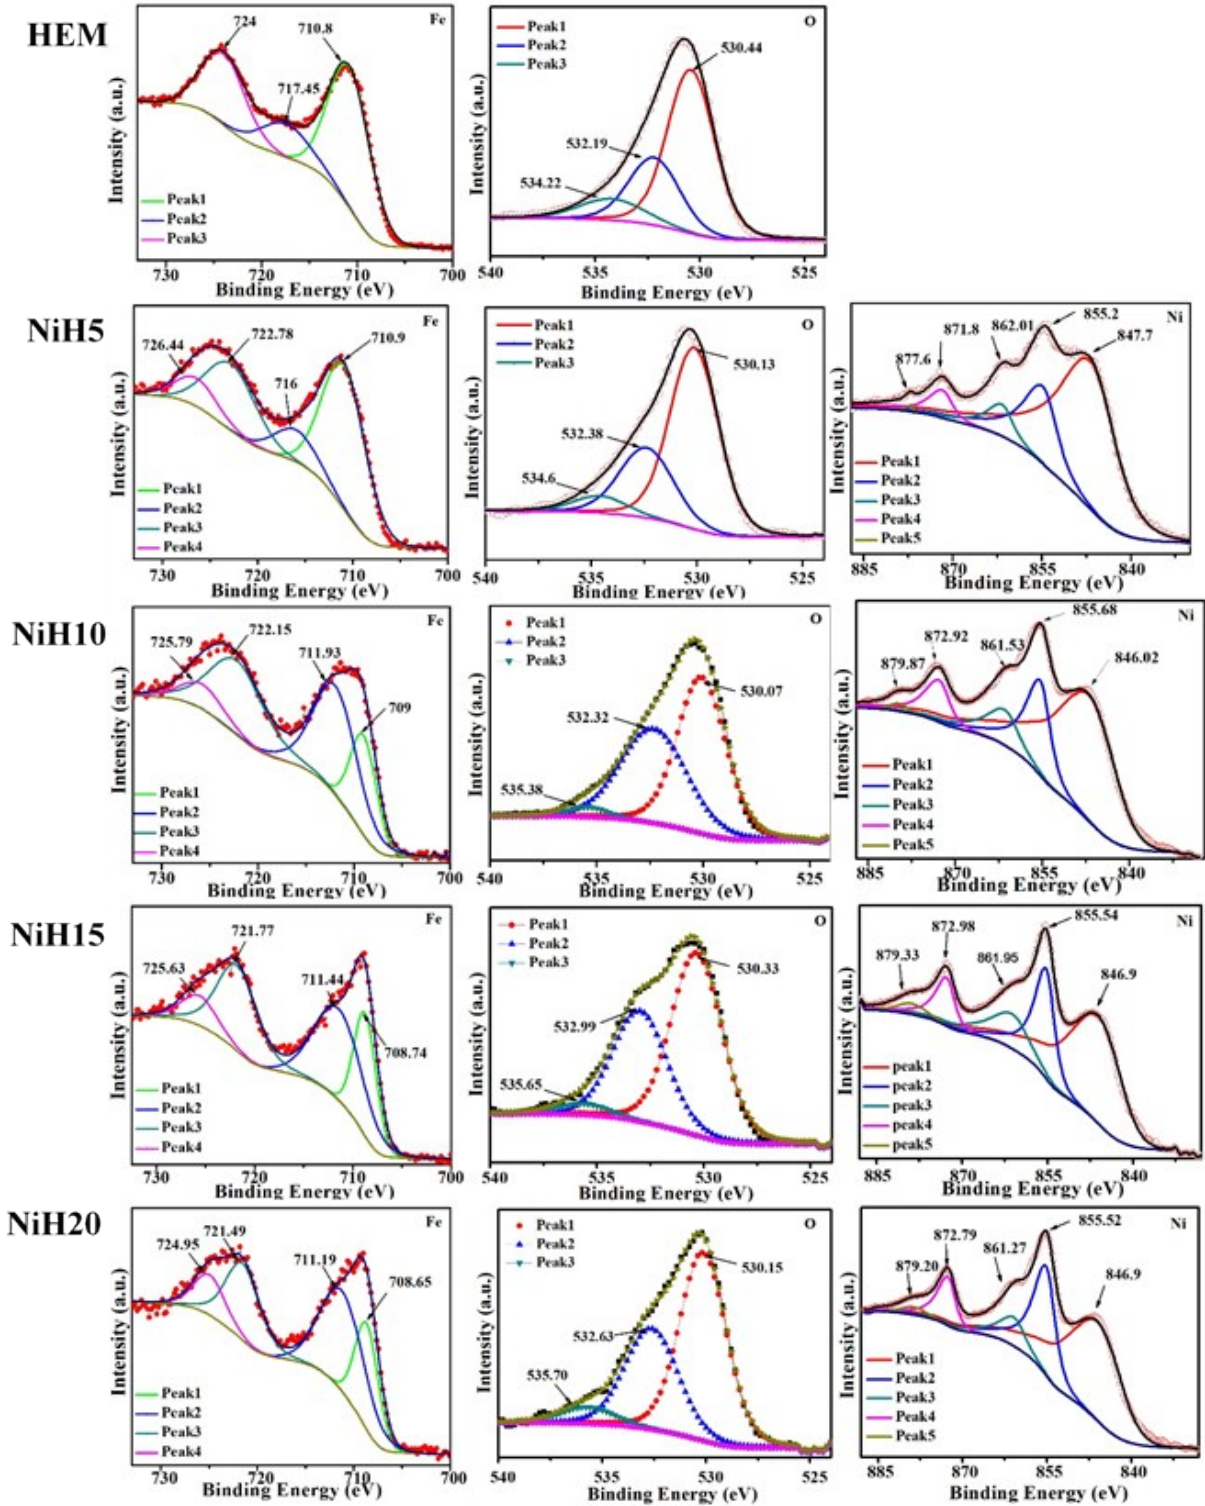

Fig: SI-1 HAXPES Spectra of Pure hematite and  $Ni_xFe_{2-x}O_3$  nanocomposites for Fe, O and Ni element respectively.

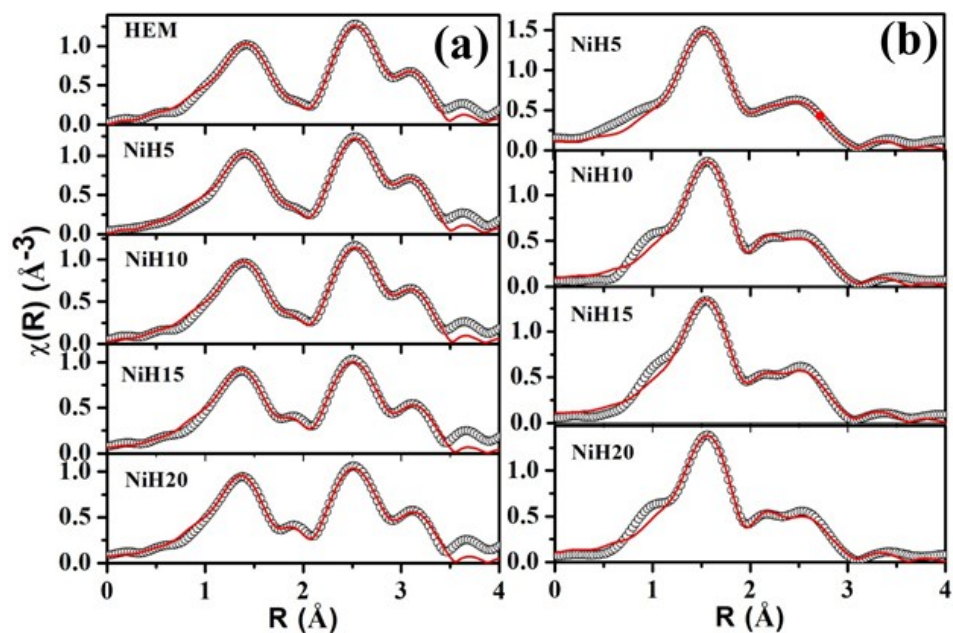

Fig. SI-2: Fourier transformed EXAFS spectra of pure hematite and  $Ni_xFe_{2-x}O_3$  nanocomposites at (a) Fe K edge (b) Ni K edge respectively. The experimental spectra are represented by Scatter points and theoretical fit is represented by Solid line.

**Table SI-1:** Bond length, coordination number and disorder factor obtain by EXAFS fitting at Fe K-edge. The Fe-Fe coordination is kept constant during the fitting.

| Path | Parameters | Hematite     | NiH5         | NiH10        | NiH15        | NiH20        |
|------|------------|--------------|--------------|--------------|--------------|--------------|
| Fe-O | R (Å)      | 1.91±0.01    | 1.90±0.01    | 1.90±0.01    | 1.89±0.01    | 1.89±0.01    |
|      | N          | 2.97±0.10    | 3.07±0.12    | 3.21±0.15    | 3.38±0.18    | 3.41±0.18    |
|      | $\sigma^2$ | 0.0066±0.000 | 0.0060±0.001 | 0.0069±0.001 | 0.0072±0.001 | 0.0068±0.001 |
| Fe-O | R (Å)      | 2.05±0.01    | 2.06±0.01    | 2.07±0.01    | 2.09±0.01    | 2.09±0.01    |
|      | N          | 2.97±0.10    | 3.07±0.12    | 3.21±0.15    | 3.38±0.18    | 3.41±0.18    |
|      | $\sigma^2$ | 0.0111±0.000 | 0.0104±0.001 | 0.0122±0.001 | 0.0122±0.001 | 0.0124±0.001 |

|              |                      |              |              |              |              |              |
|--------------|----------------------|--------------|--------------|--------------|--------------|--------------|
|              |                      | 5            | 0            | 1            | 4            | 3            |
| <b>Fe-Fe</b> | <b>R (Å)</b>         | 2.90±0.01    | 2.90±0.01    | 2.90±0.01    | 2.90±0.01    | 2.90±0.01    |
|              | <b>N</b>             | 3            | 3            | 3            | 3            | 3            |
|              | <b>σ<sup>2</sup></b> | 0.0046±0.000 | 0.0052±0.000 | 0.0063±0.000 | 0.0083±0.000 | 0.008±0.0008 |
|              |                      | 3            | 6            | 6            | 9            |              |
| <b>Fe-Fe</b> | <b>R (Å)</b>         | 3.38±0.02    | 3.37±0.01    | 3.37±0.01    | 3.37±0.01    | 3.37±0.01    |
|              | <b>N</b>             | 3            | 3            | 3            | 3            | 3            |
|              | <b>σ<sup>2</sup></b> | 0.0013±0.000 | 0.0017±0.000 | 0.0027±0.000 | 0.0050±0.001 | 0.0049±0.001 |
|              |                      | 6            | 6            | 6            | 0            | 0            |

**Table SI-2:** Bond length, coordination number and disorder factor obtain by EXAFS fitting at U L3 edge.

| <b>Path</b>     | <b>Parameters</b>    | <b>NiH5</b>   | <b>NiH10</b>  | <b>NiH15</b>  | <b>NiH20</b>  |
|-----------------|----------------------|---------------|---------------|---------------|---------------|
| <b>Ni-O</b>     | <b>R (Å)</b>         | 1.96±0.01     | 1.97±0.01     | 1.96±0.01     | 1.96±0.01     |
|                 | <b>N</b>             | 3.11±0.06     | 2.74±0.08     | 3.04±0.15     | 2.85±0.11     |
|                 | <b>σ<sup>2</sup></b> | 0.001±0.0005  | 0.0019±0.0008 | 0.0027±0.0011 | 0.0029±0.0009 |
| <b>Ni-O</b>     | <b>R (Å)</b>         | 2.10±0.01     | 2.08±0.01     | 2.09±0.01     | 2.07±0.01     |
|                 | <b>N</b>             | 3.11±0.06     | 2.74±0.08     | 3.04±0.15     | 2.85±0.11     |
|                 | <b>σ<sup>2</sup></b> | 0.0011±0.0005 | 0.0019±0.0008 | 0.0038±0.0011 | 0.0024±0.0008 |
| <b>Ni-Fe/Ni</b> | <b>R (Å)</b>         | 2.86±0.01     | 2.84±0.01     | 2.85±0.01     | 2.83±0.02     |
|                 | <b>N</b>             | 3.26±0.07     | 2.89±0.09     | 3.19±0.17     | 2.99±0.12     |
|                 | <b>σ<sup>2</sup></b> | 0.0185±0.0014 | 0.0173±0.0022 | 0.0191±0.0031 | 0.0204±0.0029 |

|          |            |               |               |               |               |
|----------|------------|---------------|---------------|---------------|---------------|
| Ni-Fe/Ni | R (Å)      | 3.45±0.01     | 3.44±0.01     | 3.44±0.01     | 3.42±0.01     |
|          | N          | 3.26±0.07     | 2.89±0.09     | 3.19±0.17     | 2.99±0.12     |
|          | $\sigma^2$ | 0.0174±0.0021 | 0.0163±0.0032 | 0.0149±0.0034 | 0.0156±0.0029 |

Elemental mapping analysis was done by recording EDAX spectra using Hitachi tabletop microscope (Model: TM 3000 equipped with SwiftED3000 SDD detector) at an accelerating voltage of 15 kV.

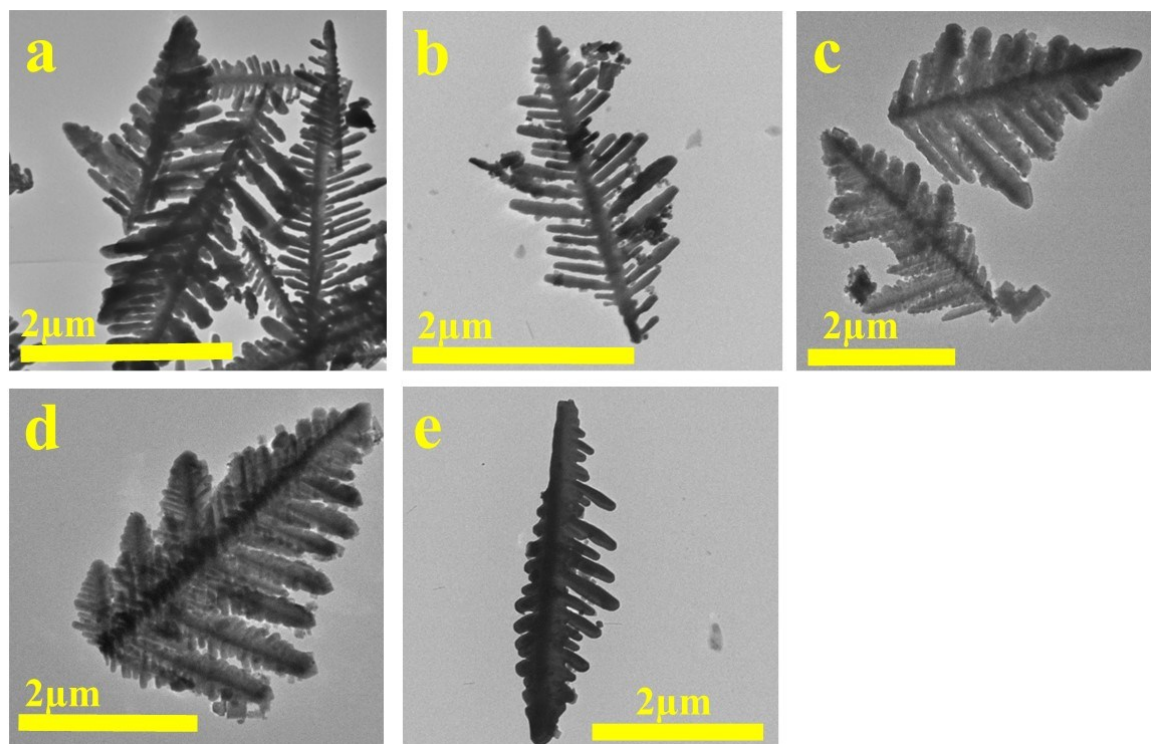

Fig. SI-3. TEM image of (a) Hem (b) NiH5 (c) NiH10 (d) NiH15 (e) NiH20.

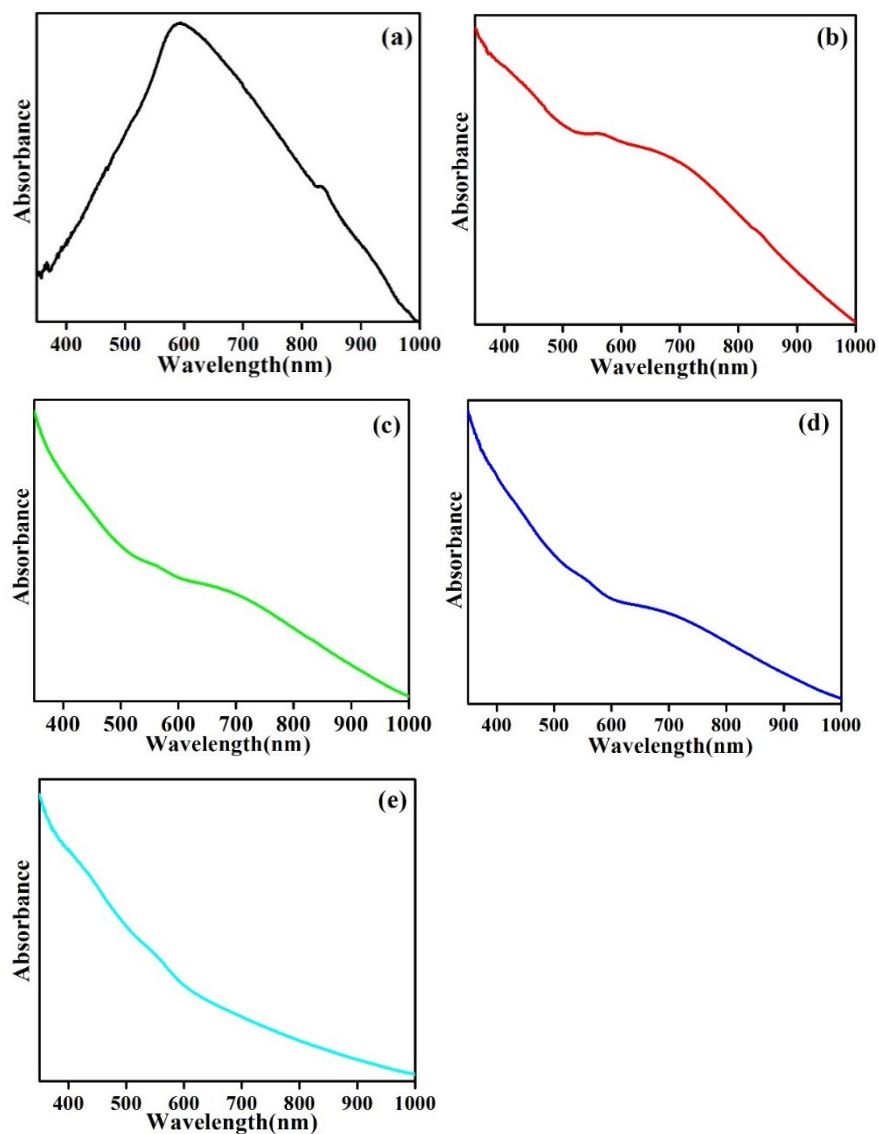

Fig SI-4 UV-Vis spectra of un-doped hematite and  $Ni_xFe_{2-x}O_3$  nanocomposites (a) Hem (b) NiH5 (c) NiH10 (d) NiH15 (e) NiH20.

From Fig. SI-4, it is clear that hematite gives absorption at 599 nm. After doping absorption peak was not as pronounced as in un-doped hematite. For NiH5 a peak at 577 was observed. For NiH10, NiH15 and NiH20 peak was observed at 575, 569, 565 nm, respectively. Also, in all doped samples a shoulder was observed in 600 to 800 nm region.

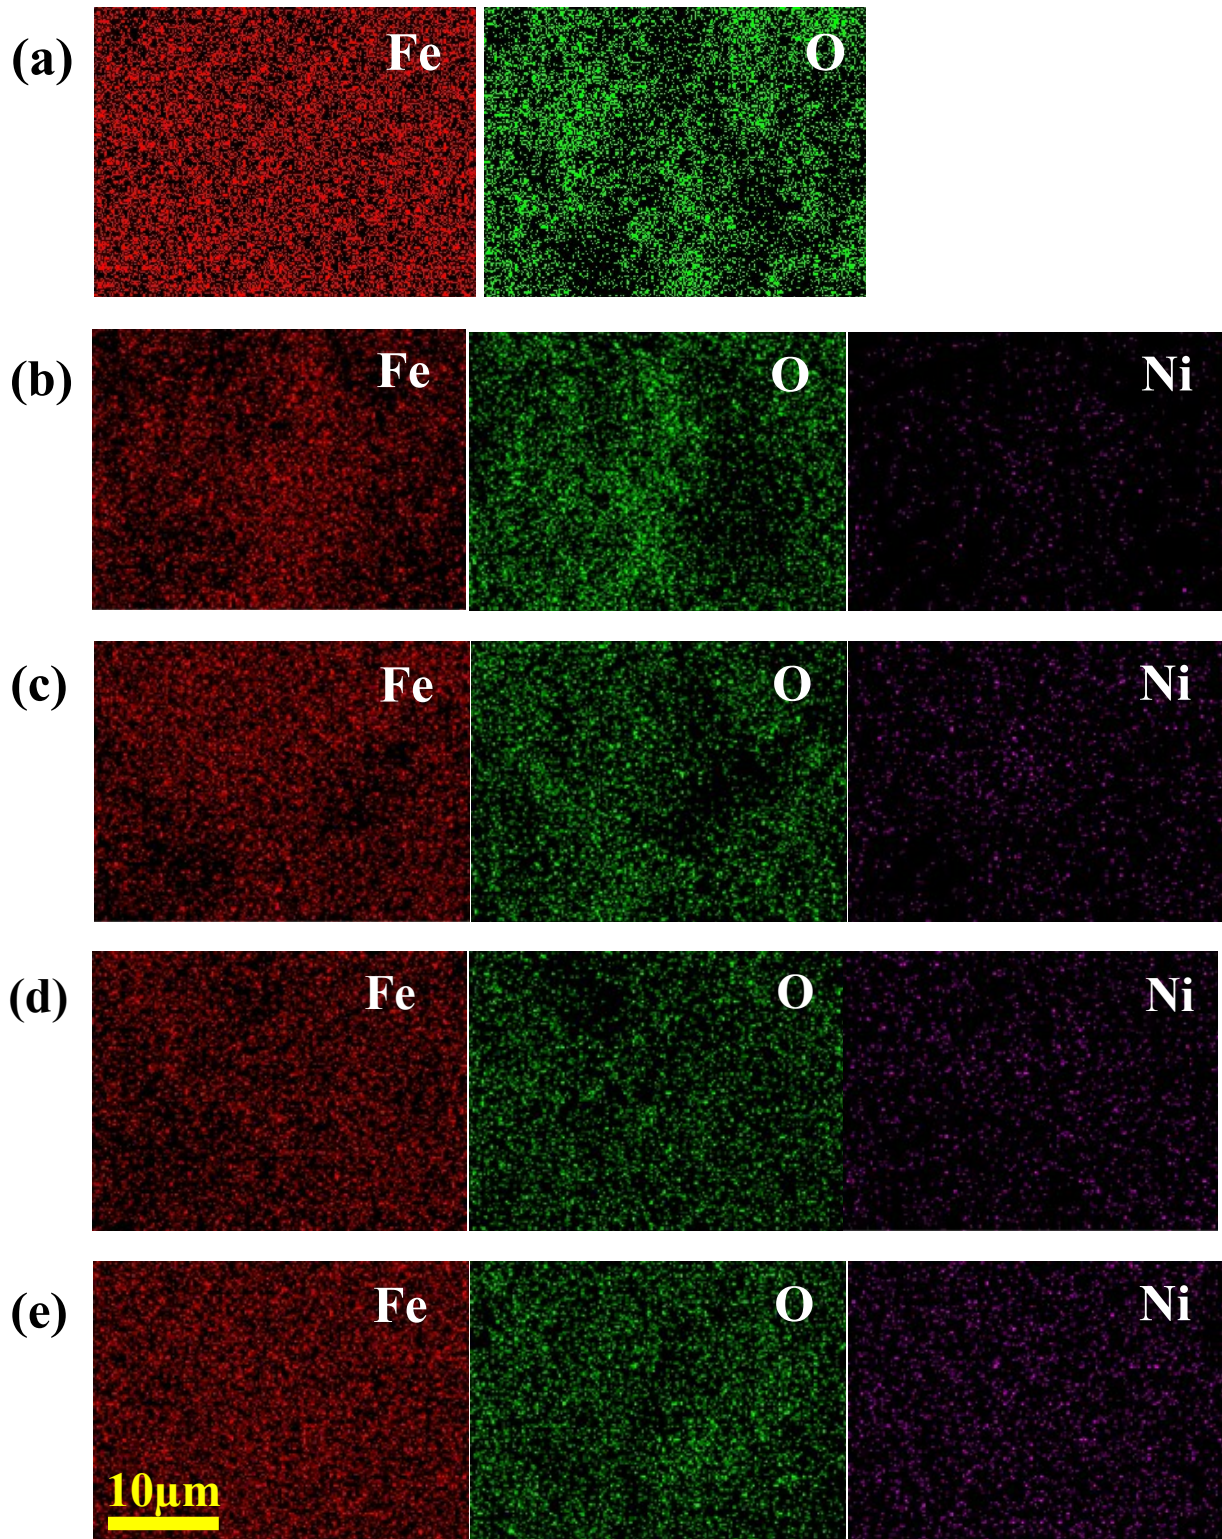

Fig. SI-5 Elemental mapping images of (a) Hem (b) NiH5 (c) NiH10 (d) NiH15 (e) NiH20.

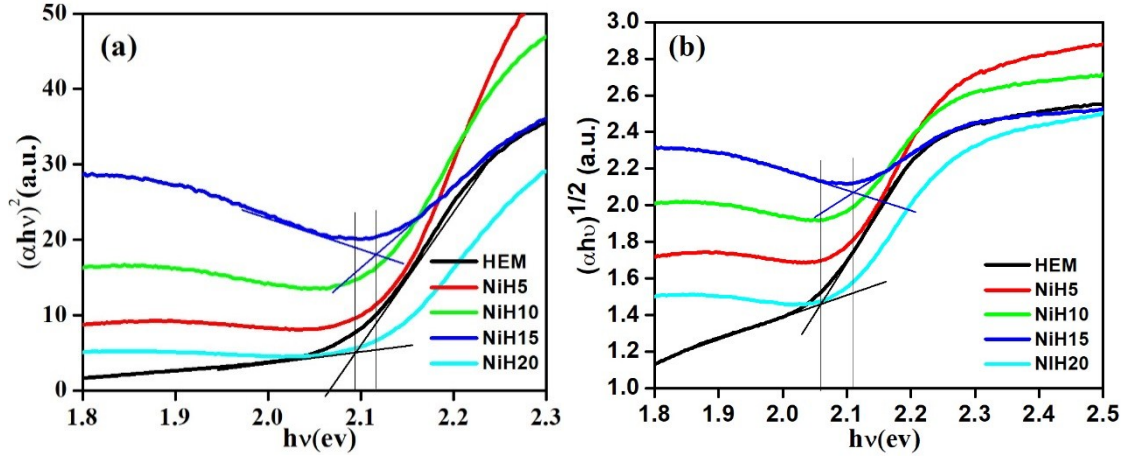

Fig. SI-6. Kubelka-Munk plot of hematite and other doped sample (a) for direct transition (b) for indirect transition derived from DRS spectra.

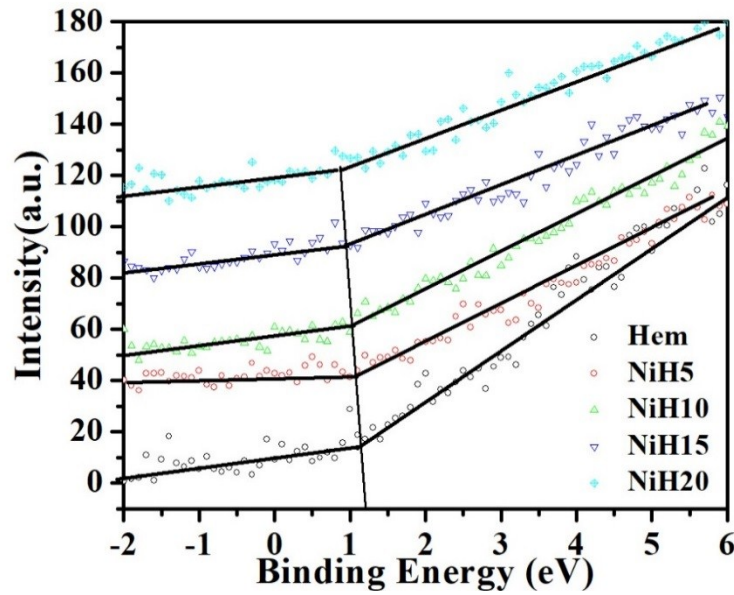

Fig. SI-7. VB XPS Spectra of Pure hematite and  $\text{Ni}_x\text{Fe}_{2-x}\text{O}_3$  nanocomposites samples.

Valence band maxima of un-doped hematite and  $\text{Ni}_x\text{Fe}_{2-x}\text{O}_3$  nanocomposites was determined by extrapolation of linear part of low energy edge of VB [1]. Energy of valence band maxima for hematite was 1.12 and 1.04, 1.01, 0.92, 0.87 for NiH5, NiH10, NiH15, NiH20 resp. relative to Fermi energy level ( $E_F$ ). The work function ( $W_S = E_F - E_{VAC}$ ) for hematite is 5.4 eV [2]. Finally, VBM values are converted vs. NHE as shown in table SI-3 [1] and also tabulated in Table 2 of the manuscript. Conduction band edge (CBE) was determined using optical band gap and VBM.



Table SI-3: Conversion of valence band maxima values to NHE scale.

| Sample | VBM w.r.t $E_F$ (eV) | VBM vs. NHE (eV)          |
|--------|----------------------|---------------------------|
| HEM    | $1.12 \pm 0.03$      | $1.12 - 4.5 + 5.4 = 2.02$ |
| NiH5   | $1.04 \pm 0.03$      | $1.04 - 4.5 + 5.4 = 1.94$ |
| NiH10  | $1.01 \pm 0.03$      | $1.01 - 4.5 + 5.4 = 1.91$ |
| NiH15  | $0.92 \pm 0.03$      | $0.92 - 4.5 + 5.4 = 1.82$ |
| NiH20  | $0.87 \pm 0.03$      | $0.87 - 4.5 + 5.4 = 1.77$ |

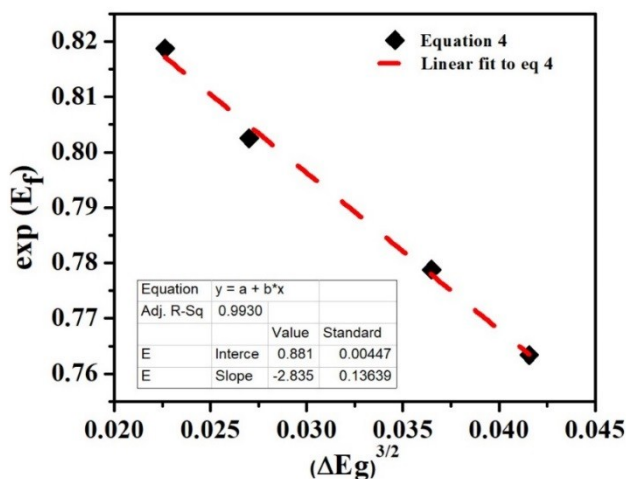

Fig. SI-8 Variation of  $(\Delta E_g)^{3/2}$  versus exponential of Fermi level ( $E_F$ ) in a linear fashion suggest that the band gap widening after doping is due to only Burstein-Moss effect.

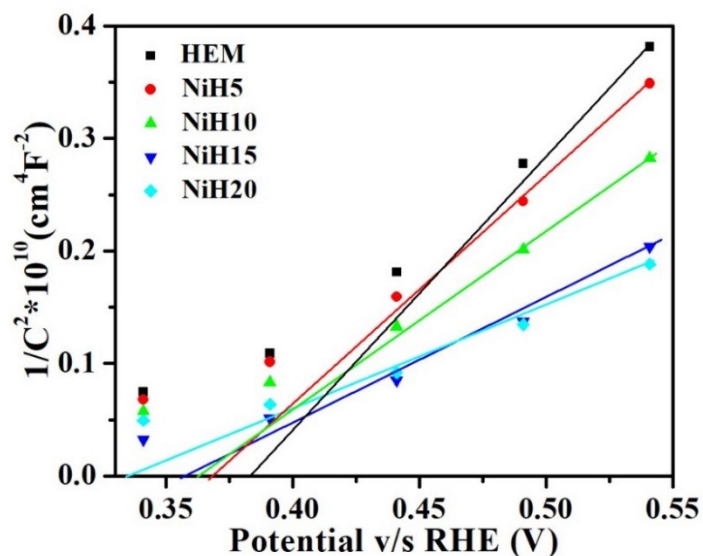

Fig. SI-9. Zoomed image of Mott-Schottky Plot indicating Flat band potential value.

Table SI-4. Circuits used simulation of impedance curves, various resistances obtained after simulations, exchange current density and rate constant.

| Sample | Circuit              | $R_1(\Omega)$ | $R_2(\Omega)$     | $R_3(\Omega)$ | $j_0$ (A/cm <sup>2</sup> ) | $k_0$ (cm/s)          |
|--------|----------------------|---------------|-------------------|---------------|----------------------------|-----------------------|
| Hem    | R(Q(R(Q(RW))))       | 14.82         | $3.7 \times 10^4$ | -             | $2.142 \times 10^{-7}$     | $6.25 \times 10^{-9}$ |
| NiH5   | R(C(R(C(RW))))       | 19.56         | 383               | -             | $1.693 \times 10^{-5}$     | $4.39 \times 10^{-7}$ |
| NiH10  | R(C(R(C(RW)))(CR)    | 23.08         | 117               | 3.33          | $5.54 \times 10^{-5}$      | $1.44 \times 10^{-6}$ |
| NiH15  | R(C(R(Q(RW)))(C(RW)) | 12.8          | 50.9              | 0.14          | $1.274 \times 10^{-4}$     | $3.30 \times 10^{-6}$ |
| NiH20  | R(C(R(C(RW)))(CR)    | 107.4         | 71.3              | 25.3          | $7.44 \times 10^{-5}$      | $1.93 \times 10^{-6}$ |

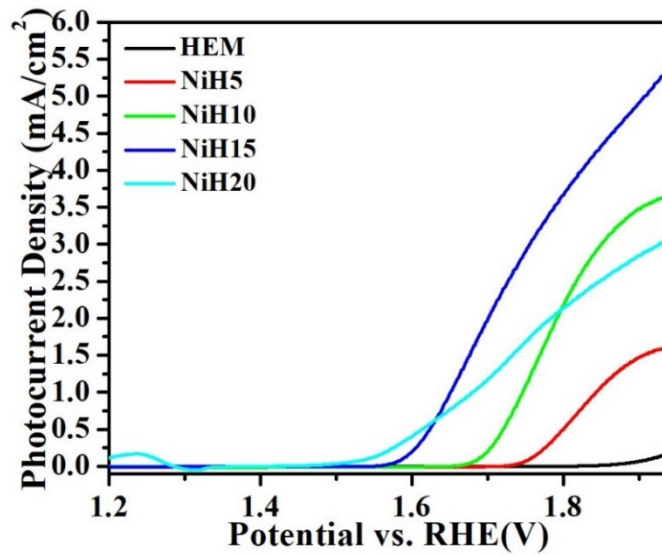

Fig. SI-10. Photocurrent Response (light-dark) of pure hematite and  $Ni_xFe_{2-x}O_3$  nanocomposites.

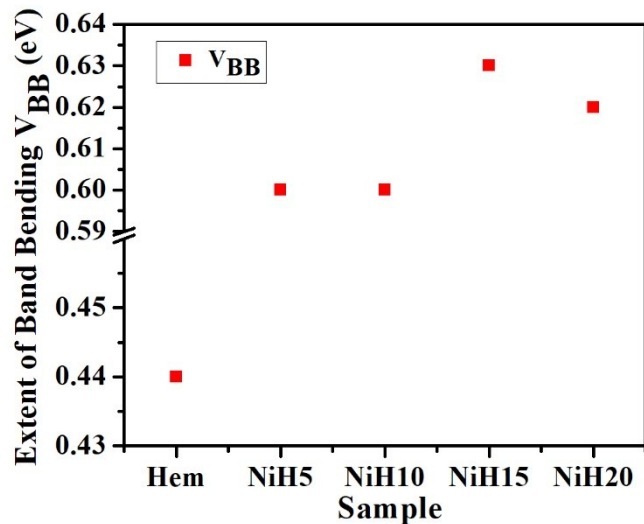

Fig. SI-11. The band bending potential for un-doped HDN and  $Ni_xFe_{2-x}O_3$  nanocomposites samples.

#### References:

1. Tian, Y.; Chang, B.; Yang, Z.; Zhou, B.; Xi, F.; Dong, X.; Graphitic Carbon Nitride-BiVO<sub>4</sub> Heterojunctions: Simple Hydrothermal Synthesis and High Photocatalytic Performances. *Rsc. Adv.*, **2014**, 4, 4187–4193.
2. Kraushofer, F.; Jakub, Z.; Bichler, M.; Hulva, J.; Drmota, P.; Weinold, M.; Schmid, M.; Setvin, M.; Diebold, U.; Blaha, P.; Parkinson, G.S.; Atomic-Scale Structure of the Hematite  $\alpha$ -Fe<sub>2</sub>O<sub>3</sub>(1 $\bar{1}$ 02) “R-Cut” Surface, *J. Phys. Chem. C*, **2018**, 122, 1657–1669.
